# Supplementary material for: Characterization of Three New Glutaredoxin Genes in the Arbuscular Mycorrhizal Fungus Rhizophagus irregularis: Putative Role of RiGRX4 and RiGRX5 in Iron Homeostasis
Source: PubMed Central journal article supplement (PMC4765768; doi:10.1371/journal.pone.0149606), 2016-02-22
Supplement: pone.0149606.s002.pdf [file pone.0149606.s002.pdf]

**S1 Table. Oligonucleotides used in this study**

| Primer       | Sequence 5' - 3'                                      |
|--------------|-------------------------------------------------------|
| ScGRX3f      | ATGTGTTCTTTTCAGGTTCCATCTG                             |
| ScGRX3r      | TTAAGATTGGAGAGCATGCTGCAA                              |
| ScGRX4f      | ATGACTGTGGTTGAAATAAAAAGC                              |
| ScGRX4r      | TTACTGTAGAGCATGTTGGAAATA                              |
| ScGRX5f      | ATGTTTCTCCAAAATTCAATCC                                |
| ScGRX5r      | TCAACGATCTTTGGTTTCTTCTTC                              |
| Grx4.fF      | <u>GCGGCCGC</u> ATGGACAGCAACTG                        |
| Grx4.fR      | <u>GCGGCCGC</u> TCAAATTGATTTCTCTAA                    |
| Grx5.fF      | <u>GCGGCCGC</u> ATGAGCTTACGATCATA                     |
| Grx5.fR      | <u>GCGGCCGC</u> TTAATTTTCTCCTGTTC                     |
| Grx7.fF      | ATGTCTAAAGCGGCGATCTTACC                               |
| Grx7.fR      | TTATAAAGATGGTCGAAAAATTCGTG                            |
| GintGRXfw2   | GAAGATTCCGAAGGAAGAGC                                  |
| GintGRXrev2  | CAACGTGTTGACCCTTGATA                                  |
| RiGrx4.qF    | GATTTTGGGCAACATGGGC                                   |
| RiGrx4.qR    | CGGGGAATTTCTCAGCCTCAATCT                              |
| RiGrx5.qF    | GCGCAAGGTTTGGATTCT                                    |
| RiGrx5.qR    | AGGGACTGTTGGCCATTGT                                   |
| RiGrx7.qF    | TGGGAGAAGGAGGTGAAGAA                                  |
| RiGrx7.qR    | CCAATGCTTCTCGAAACG                                    |
| GintPDXfw    | CTGGAGATCCTGCTAAAAGAGC                                |
| GintPDXrev   | CCAAGATCCTCCGATACTTCG                                 |
| GintEFfw     | GCTATTTGATCATTGCCGCC                                  |
| GintEFrev    | TCATTA AACGTTCTTCCGACC                                |
| RiGRX4-sfi-F | <u>CAAGGCCATTACGGCC</u> ATGGACAGCAACTTGATAGA ACTTAC   |
| RiGRX4-sfi-R | <u>GATGGCCGAGGCGGCCG</u> AAATTGATTTCTCTAAAGCAAACATGG  |
| RiGRX5-sfi-F | <u>CAAGGCCATTACGGCC</u> ATGAGCTTACGATCATTAAACACGTC    |
| RiGRX5-sfi-R | <u>GATGGCCGAGGCGGCCG</u> ATTTTCTCCTGTTCTAATTCATTTTATG |
| RiGRX6-sfi-F | <u>CAAGGCCATTACGGCC</u> ATGTCTAAAGCGGCGATCTTAC        |
| RiGRX6-sfi-R | <u>GATGGCCGAGGCGGCCG</u> ATAAAGATGGTCGAAAAATTCGTG     |
